# Supplementary material
Source: publisher figshare collection journal article supplement (https://acs.figshare.com/ndownloader/files/3799072)
Supplement: Supplementary file 1 [file 3799072]

## **Supporting Information**

### **Co-Delivery of Protein and Small Molecule Therapeutics using Nanoparticle-Stabilized Nanocapsules**

Chang Soo Kim, Rubul Mout, Yunlong Zhao, Yi-Cheun Yeh, Rui Tang, Youngdo Jeong, Bradley Duncan, Jeanne A. Hardy, Vincent M. Rotello\*

Department of Chemistry, University of Massachusetts, 710 North Pleasant Street, Amherst, Massachusetts 01003, United States

## **AUTHOR INFORMATION**

### **Corresponding Author**

\* Phone: +1-413-545-2058. Fax: +1-413-545-4490. E-mail: [rotello@chem.umass.edu](mailto:rotello@chem.umass.edu).

## **Table of Contents**

|                                                      |           |
|------------------------------------------------------|-----------|
| <b>Table S1</b>                                      | <b>S2</b> |
| <b>Figure S1</b>                                     | <b>S2</b> |
| <b>Table S2</b>                                      | <b>S2</b> |
| <b>TEM sample preparation</b>                        | <b>S3</b> |
| <b>Figure S2</b>                                     | <b>S3</b> |
| <b>Figure S3</b>                                     | <b>S3</b> |
| <b>Figure S4</b>                                     | <b>S4</b> |
| <b>Caspase-3 (CASP3) expression and purification</b> | <b>S4</b> |
| <b>Figure S5</b>                                     | <b>S5</b> |
| <b>Table S3</b>                                      | <b>S5</b> |
| <b>Isoelectric point of CASP3</b>                    | <b>S5</b> |

**Table S1.** Size and zeta potential of arginine-functionalized gold nanoparticles (Arg-AuNP) were measured by DLS at 5mM PB, pH=7.4.

| Name     | Hydrodynamic diameter (nm) | Zeta potential (mV) |
|----------|----------------------------|---------------------|
| Arg-AuNP | 16 ± 8                     | 43 ± 11             |

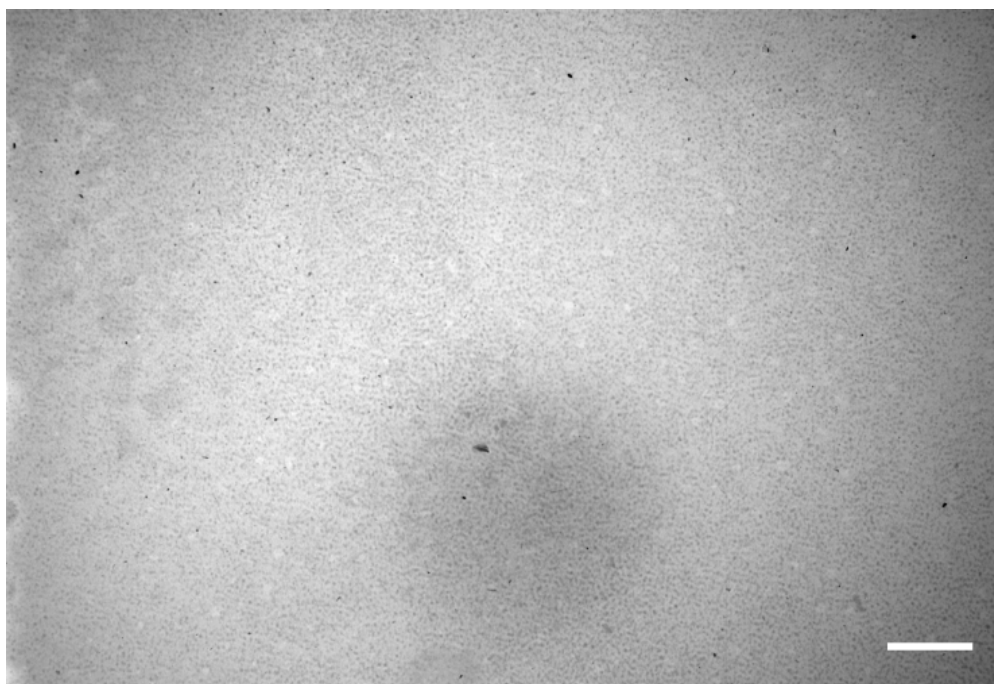

**Figure S1.** TEM image of Arg-AuNP. The TEM image confirmed 2 nm core diameters of gold nanoparticles (Arg-AuNP). Scale bar: 100 nm.

**Table S2.** Characterization of NPSCs. Size and zeta potential of NPSCs were measured by DLS.

|                | PTX | CASP3 | TF | Hydrodynamic diameter (nm) | Zeta potential (mV) |
|----------------|-----|-------|----|----------------------------|---------------------|
| NPSC           | -   | -     | -  | 109 ± 58                   | -59 ± 9             |
| NPSC-PTX       | +   | -     | -  | 107 ± 52                   | -53 ± 7             |
| NPSC-TF        | -   | -     | +  | 123 ± 64                   | -52 ± 12            |
| NPSC-CASP3     | -   | +     | -  | 129 ± 50                   | -54 ± 14            |
| NPSC-PTX-TF    | +   | -     | +  | 140 ± 50                   | -49 ± 14            |
| NPSC-PTX-CASP3 | +   | +     | -  | 142 ± 64                   | -55 ± 9             |

### TEM sample preparation

TEM samples were prepared by drying a drop (10  $\mu$ L) of the NPSC solution on a copper grid coated with amorphous carbon. For protein-stabilized capsules, 20  $\mu$ L uranyl acetate solution (2 wt% in water) was added to the copper grid. After 1 min, the grid was blotted with a piece of filter paper. The grid was finally dried overnight at room temperature before TEM imaging.<sup>1</sup>

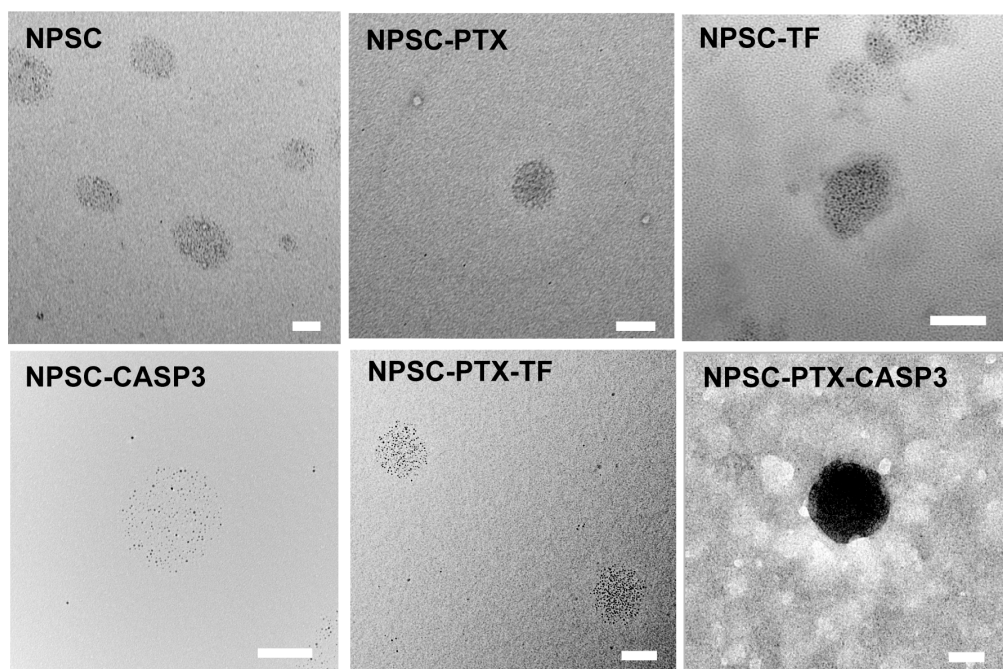

**Figure S2.** TEM images of different NPSCs. Scale bar: 100 nm.

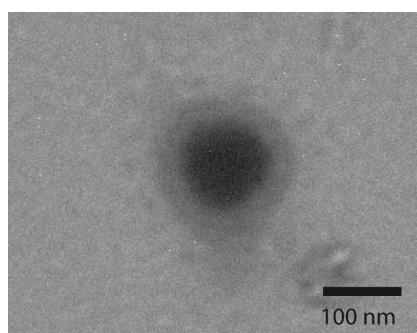

**Figure S3.** NPSC-CASP3 was stained with uranyl acetate (2% (v/v) in MilliQ water). The halo around the AuNP core indicates the addition of protein to the surface. The average thickness of the protein shell of NPSC-CASP3 is  $21 \text{ nm} \pm 1 \text{ nm}$  (sample number = 5).

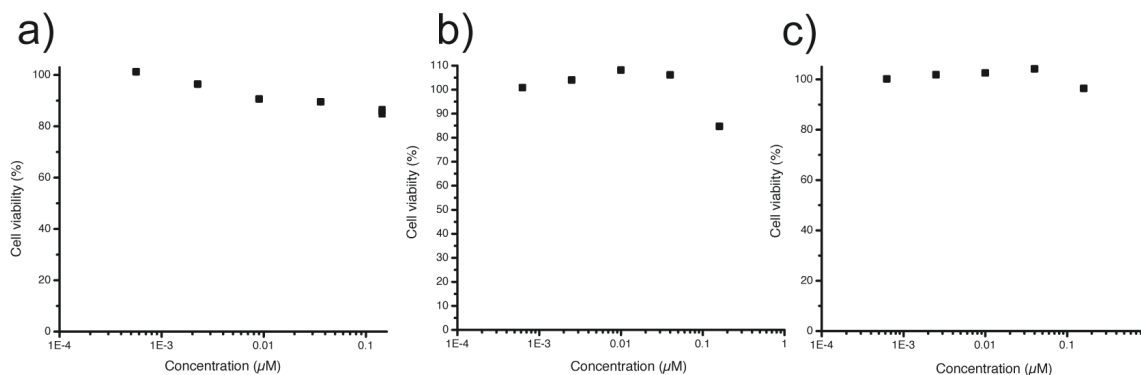

**Figure S4.** Cell viability studies with (a) Arg-AuNP, (b) CASP3, and (c) transferrin. Cell viabilities with different concentrations were measured with an Alamar blue assay.

### Caspase-3 (CASP3) expression and purification

The full-length human *CASP3* gene in the pET23b vector<sup>2</sup> (supplied by Addgene) was used for the expression of recombinant CASP3 in BL21(DE3) *E. coli*. Briefly, the cells were harvested after a three-hour IPTG induction to achieve an enzymatic self-activation of CASP3. The supernatant of lysate was loaded onto a 5 mL HiTrap Ni-affinity column (GE Healthcare) followed by a washing step using 50 mM sodium phosphate (pH 8.0), 300 mM NaCl, and 50 mM imidazole. The CASP3 protein was eluted with a buffer containing 50 mM sodium phosphate (pH 8.0), 300 mM NaCl, and 250 mM imidazole. The eluted fraction was 7-fold diluted into 25 mM Tris pH 8.0 and 5 mM DTT and loaded onto the 5 mL Macro-Prep High Q column (Bio-Rad Laboratories, Inc.). The column was developed with a linear NaCl gradient elution and the CASP3 was finally eluted in 25 mM Tris pH 8.0, 120 mM NaCl and 5 mM DTT. The eluted protein was stored at -80 °C in the elution buffer conditions. The active form of CASP3 was analyzed by SDS-PAGE to be ~98% pure (Figure S5). Further ESI-MS analysis was carried on to confirm the mass (Table S4).

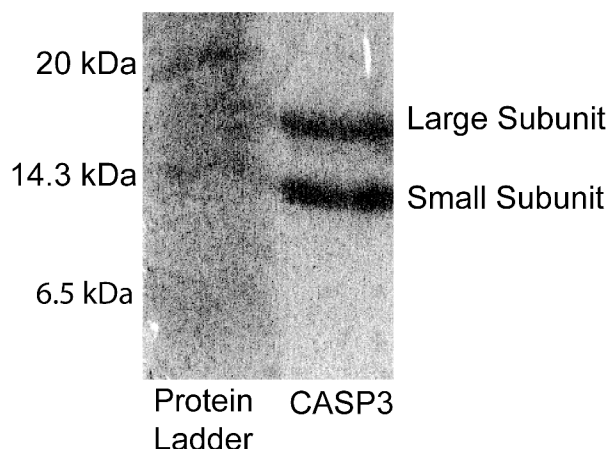

**Figure S5.** SDS-PAGE of CASP3.

**Table S3.** Molecular weight of CASP3. The molecular weight of CASP3 was identified by mass spectrometry.

|                      | Prediction | Mass spect. |
|----------------------|------------|-------------|
| <b>Large subunit</b> | 16.6 kDa   | 16.6 kDa    |
| <b>Small subunit</b> | 13.0 KDa   | 13.0 KDa    |

**Isoelectric point of CASP3:** The isoelectric point of mature CASP3 (pI=6.7) was calculated using following sequences for the large and small subunits respectively.

Large subunit:

SGISLDNSYKMDYPEMGLCIIINNKNFHKSTGMTSRSGTDVDAANLRETFRNLYKEVRN  
KNDLTREEIVELMRDVSKEDHSKRSSFVCVLLSHGEEGIIFGTNGPVDLKKITNFFRGDR  
CRSLTGKPKLFIIQACRGTELDGCIETD

Small subunit:

SGVDDDMACHKIPVEADFLYAYSTAPGYYSWRNSKDGSWFIQSLCAMLKQYADKLEF  
MHILTRVNRKVATEFESFSFDATFHAKKQIPCIVSMLTKELYFYHLEHHHHHH

(1) Wang, Y., Fang, J., Cheng, D., Wang, Y., and Shuai, X. (2014) A pH-sensitive micelle for codelivery of siRNA and doxorubicin to hepatoma cells. *Polymer* 55, 3217-3226.

(2) Zhou, Q., Snipas, S., Orth, K., Muzio, M., Dixit, V. M., and Salvesen, G. S. (1997) Target protease specificity of the viral serpin CrmA. Analysis of five caspases. *J. Biol. Chem.* 272, 7797-7800.
